# Supplementary material for: Lumican, an Exerkine, Protects against Skeletal Muscle Loss
Source: MDPI journal article supplement (doi:10.3390/ijms231710031), 2022-09-02
Supplement: s1 [file s1]

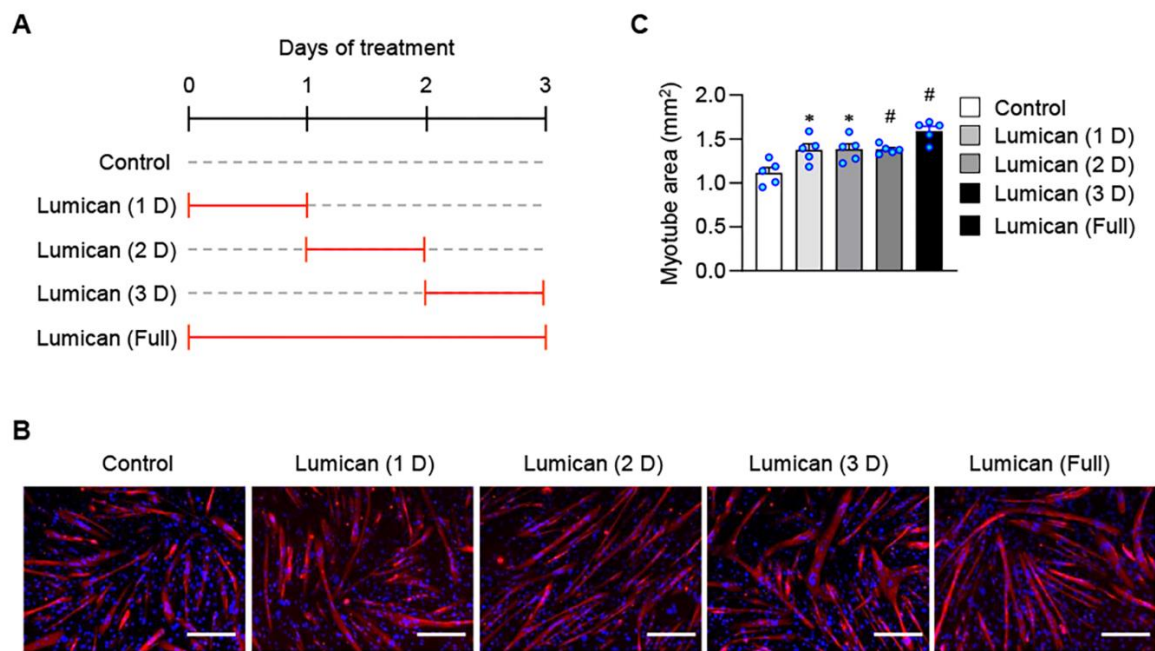

**Figure S1.** Lumican-mediated myoblast differentiation in cells at various stages of myogenic differentiation. (A) Experimental design. C2C12 cells were treated with or without 10 nM lumican for the indicated periods of time. Red lines indicate the periods of lumican treatment. All cells were differentiated for 3 days. (B) Myotubes were stained with the anti-myosin heavy chain antibody. (C) Quantitative results of myotube area per myotube are shown. Each bar represents the mean  $\pm$  standard error of the mean (SEM). Scale bars: 200  $\mu$ m. \* $P$  < 0.05 and # $P$  < 0.01 vs. the untreated control.

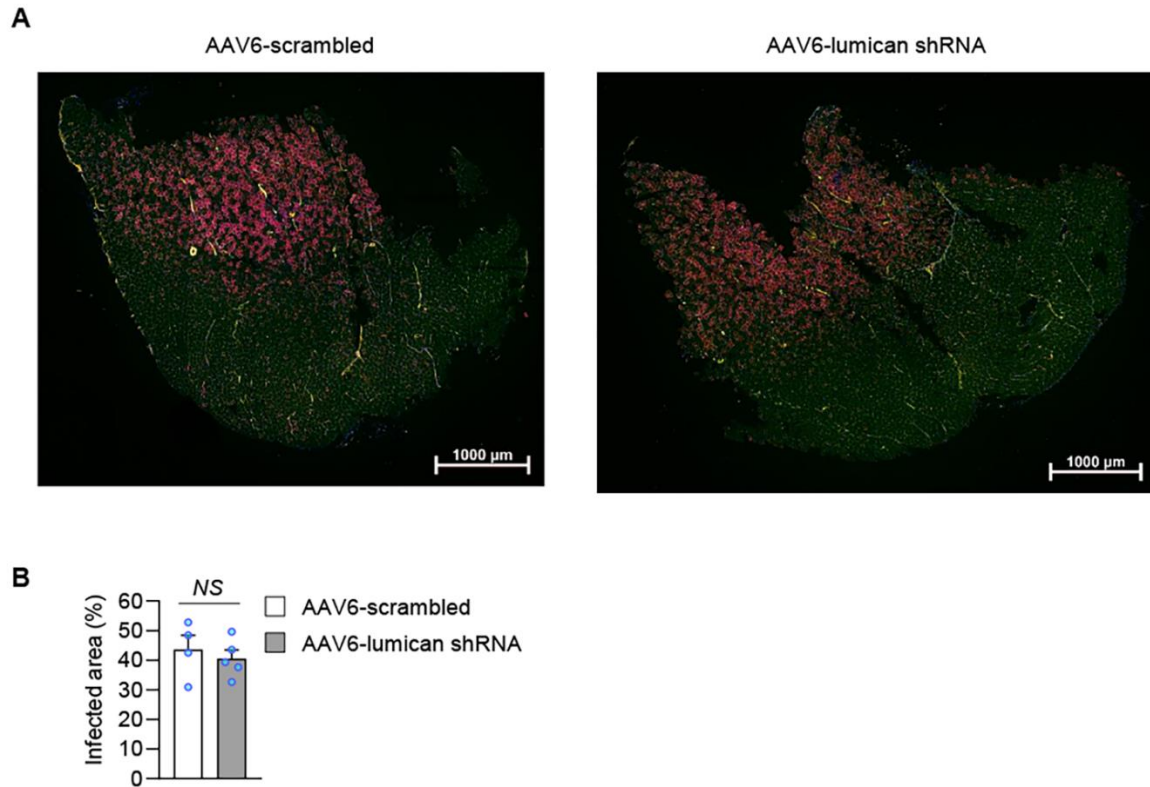

**Figure S2.** Transduction efficiency of adeno-associated virus serotype 6 (AAV6) in gastrocnemius (GC) muscle. Eight-week-old male C57BL/6 mice were administered AAV6-scrambled-mCherry (n = 4) or AAV6-lumican shRNA-mCherry (n = 5) into the GC muscle (once weekly for 4 weeks). The mice were sacrificed after 4 weeks, and GC muscles were harvested, weighed, and fixed in 4% paraformaldehyde. **(A)** Muscle sections were stained with the FITC-labeled wheat germ agglutinin (green). Red areas represent AAV6-infected areas. **(B)** Percentages of AAV6-infected areas. Each bar represents the mean  $\pm$  standard error of the mean (SEM). Scale bars: 1,000  $\mu$ m. NS, not significant.

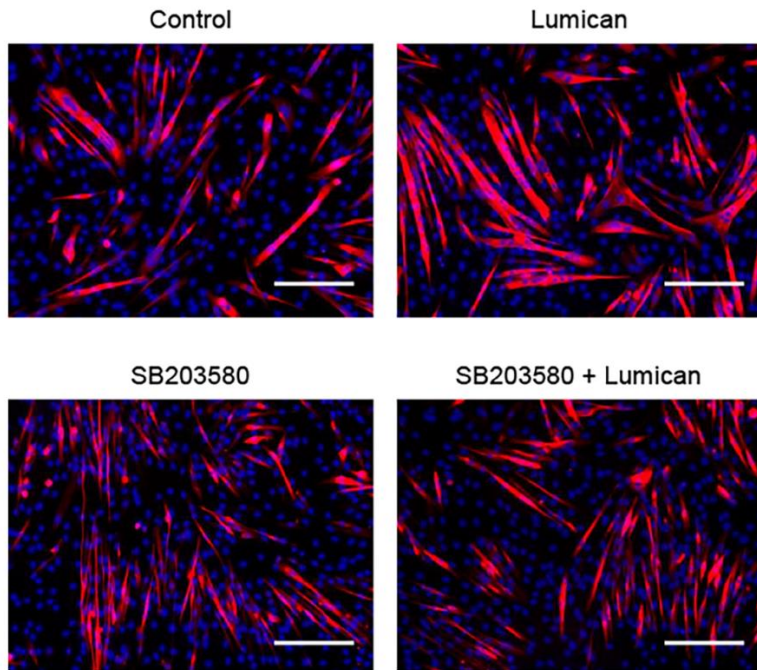

**Figure S3.** Lumican-stimulated myogenesis mediated by p38 MAPK. C2C12 cells were differentiated with 10 nM lumican in the presence or absence of SB203580 for 3 days. Myotubes were stained with the anti-myosin heavy chain antibody. Representative images are shown. Quantitative results of myotube area per myotube are presented in Figure 5B. Scale bars: 200  $\mu\text{m}$ .

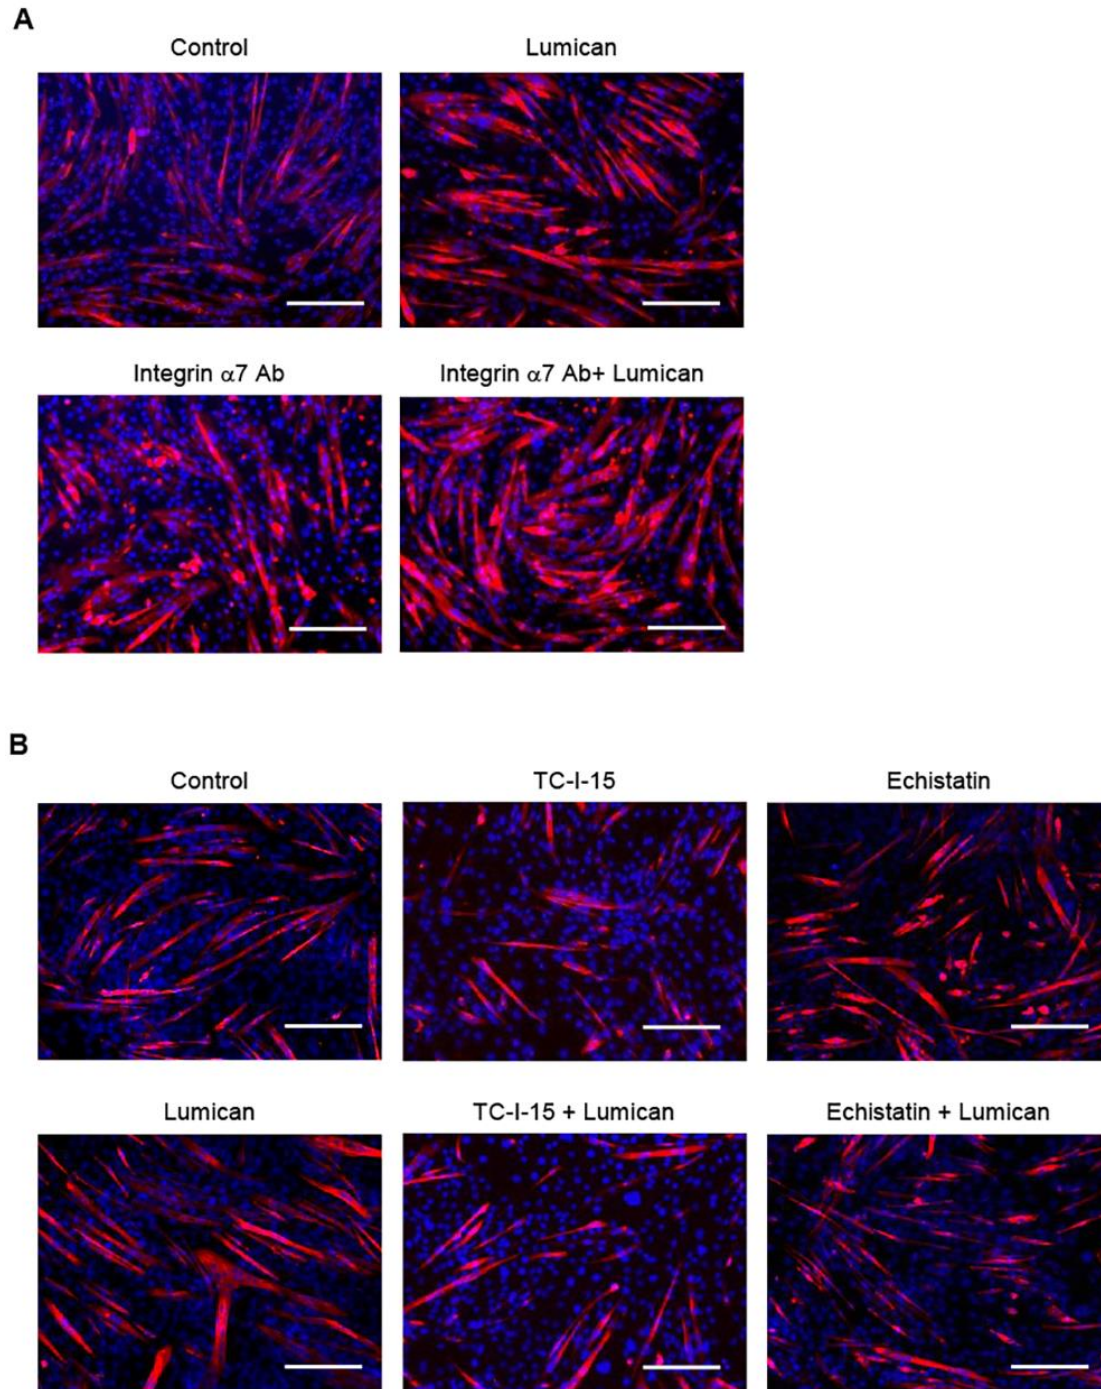

**Figure S4.** Lumican-stimulated myogenesis mediated by integrins. **(A)** C2C12 cells were differentiated with 10 nM lumican in the presence or absence of integrin  $\alpha 7$  neutralizing antibody for 3 days. Myotubes were stained with the anti-myosin heavy chain antibody. Representative images are shown. Quantitative results of myotube area per myotube are presented in Figure 6B. **(B)** C2C12 cells were differentiated with 10 nM lumican in the presence or absence of integrin inhibitors, such as TC-I-15 and echistatin, for 3 days. Representative images are shown. Quantitative results of myotube area per myotube are presented in Figure 6C. Scale bars: 200  $\mu$ m.



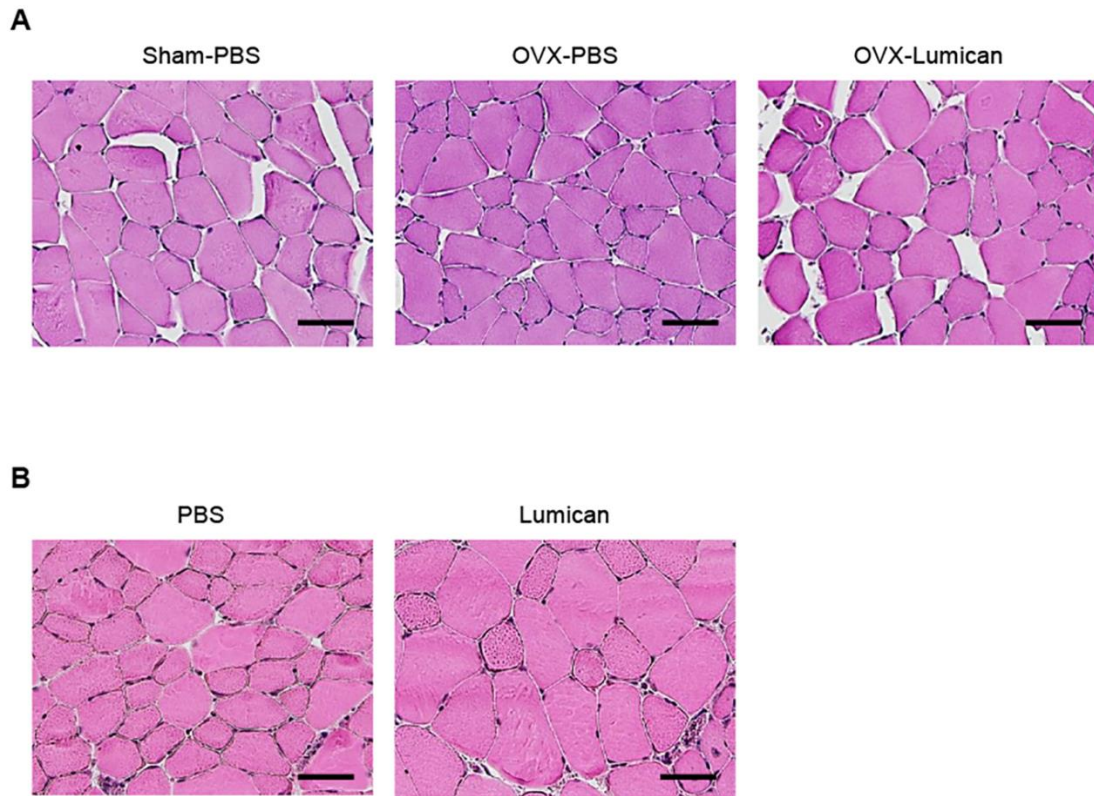

**Figure S5.** H&E staining in muscles after lumican treatment. **(A)** Ovariectomized (OVX) mice were intravenously injected with PBS or 2  $\mu$ g lumican for 4 weeks, as described in the Materials and Methods. The mice were sacrificed, and gastrocnemius (GC) muscles were harvested and fixed in 4% paraformaldehyde. GC muscles sections were stained with hematoxylin and eosin. Representative images are shown. Quantitative results of their cross-sectional areas (CSAs) are in Figure 7B. **(B)** Male C57BL/6 mice were subjected to the tail suspension, and lumican (5  $\mu$ g/mouse) was injected into the left tibialis anterior (TA) muscle twice weekly for 2 weeks. The mice were sacrificed, and TA muscles were harvested and fixed in 4% paraformaldehyde. TA muscle sections were stained with hematoxylin and eosin. Representative images are shown. Quantitative results of their CSAs are in Figure 7E. Scale bars: 50  $\mu$ m.

**Table S1.** Primer sequences used for real-time PCR amplification.

| mRNA            | Primer sequences                                                       |
|-----------------|------------------------------------------------------------------------|
| <i>18S rRNA</i> | Sense: CTCAACACGGGAAACCTCAC<br>Antisense: CGCTCCACCAACTAAGAACG         |
| <i>Itga2</i>    | Sense: GACCAGCTTTTCACCTGCAG<br>Antisense: CAACATCCACGAGGGAAGGG         |
| <i>Itga7</i>    | Sense: GATCGTCCGAGCCAACATCACA<br>Antisense: CTAACAGCCCAGCCAGCACT       |
| <i>Itgav</i>    | Sense: GGTGTGGATCGAGCTGTCTT<br>Antisense: CAAGGCCAGCATTACAGTG          |
| <i>Itgb1</i>    | Sense: AGTGCTCCCACTTCAATCTCACCA<br>Antisense: TCTCCTTGCAATGGGTCACAGGAT |
| <i>Itgb3</i>    | Sense: CGGGCTAACCGACCAGGTGT<br>Antisense: CCTGCATGATGGCGTCAAAG         |
| <i>Lumican</i>  | Sense: CTTTGAGAACGTCACAGACC<br>Antisense: GGACTTTGGAAGTGGACCGA         |
| <i>Mef2a</i>    | Sense: CCCAGCCACGCTACATAGAA<br>Antisense: TTGGAGAGGCCCTTGAGTTT         |
| <i>Mrf4</i>     | Sense: GACTGCCCAAGGTGGAGATT<br>Antisense: AAATCCGCACCCTCAAGAAT         |
| <i>Myf5</i>     | Sense: ACCAGAGACTCCCCAAGGTG<br>Antisense: CAAAGCTGCTGTTCTTTCGG         |
| <i>MyoG</i>     | Sense: GCCATCCAGTACATTGAGCG<br>Antisense: GCTGTGGGAGTTGCATTCAC         |

**Table S2.** List of antibodies.

| List                               | Company purchased         | Catalog number |
|------------------------------------|---------------------------|----------------|
| Anti-actin antibody                | Sigma-Aldrich             | A3854          |
| Anti-Akt antibody                  | Cell Signaling Technology | #9272          |
| Anti-Atrogin-1 antibody            | Abcam                     | ab168372       |
| Anti-ERK1/2 antibody               | Cell Signaling Technology | #9102          |
| Anti-Integrin $\alpha 7$ antibody  | Origene                   | AM20012AF-N    |
| Anti-JNK antibody                  | Cell Signaling Technology | #9252          |
| Anti-Murf-1 antibody               | ECM Biosciences           | MP3401         |
| Anti-myosin (fast) antibody        | Sigma-Aldrich             | M1570          |
| Anti-p38 antibody                  | Cell Signaling Technology | #9212          |
| Anti-p70S6K antibody               | Cell Signaling Technology | #9202          |
| Anti-P-Akt (S473) antibody         | Cell Signaling Technology | #9271          |
| Anti-P-ERK1/2 (T202/Y204) antibody | Cell Signaling Technology | #9101          |
| Anti-P-JNK (T183/Y185) antibody    | Cell Signaling Technology | #9251          |
| Anti-P-p38 (T180/Y182) antibody    | Cell Signaling Technology | #9211          |
| Anti-P-p70S6K (T389) antibody      | Cell Signaling Technology | #9205          |
| Anti-puromycin antibody            | EMD Millipore             | MABE343        |
| FITC-labeled WGA                   | Sigma-Aldrich             | L4895          |
